# Supplementary material for: Avoiding commercial kit-based DNA isolation and purification steps: a rapid method for Cryptosporidium oocyst detection
Source: Royal Society of Chemistry journal article supplement (doi:10.1039/d4sd00344f), 2025-01-01
Supplement: d4sd00344f1.pdf [file d4sd00344f1.pdf]

*Supplementary Information for*

**Avoiding Commercial Kit-Based DNA Isolation and Purification  
Steps: A Rapid Method for *Cryptosporidium* Oocyst Detection**

Rabbee G. Mahmudunnabi<sup>a,b</sup>, Amandeep Singh Pannu<sup>c</sup>, Nam-Trung Nguyen<sup>a,b</sup>, Helen M.  
Stratton<sup>a,b\*</sup>, Muhammad J. A. Shiddiky<sup>c</sup> \*

<sup>a</sup>School of Environment and Science, Griffith University, Nathan, QLD 4111, Australia

<sup>b</sup>Queensland Micro- and Nanotechnology Centre, Griffith University, Nathan, QLD 4111,  
Australia

<sup>c</sup>Rural Health Research Institute (RHRI), Charles Sturt University, Orange, NSW 2800,  
Australia

\*Corresponding Authors: [mshiddiky@csu.edu.au](mailto:mshiddiky@csu.edu.au) (MJAS), [h.stratton@griffith.edu.au](mailto:h.stratton@griffith.edu.au) (HS)



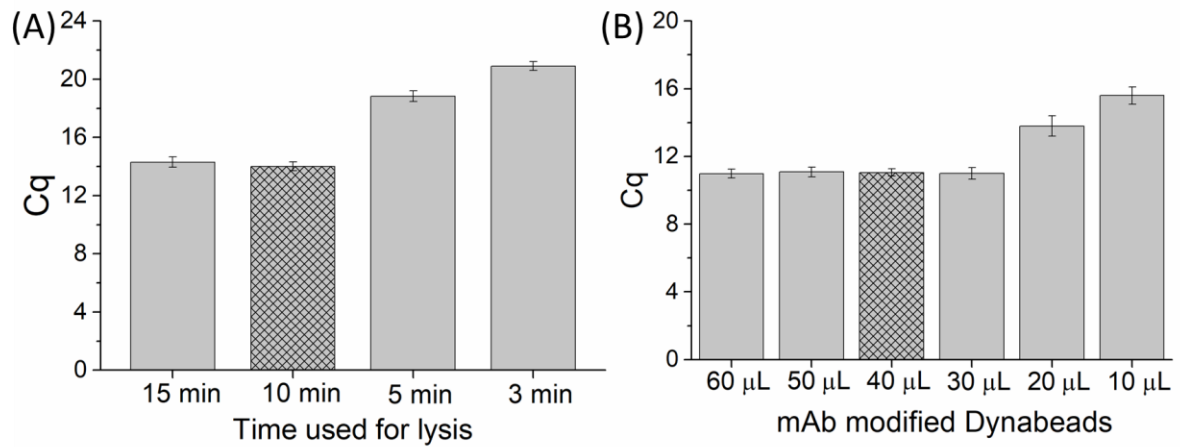

**Figure S2.** Optimisation analytical parameters. (A) Optimisation of heat (95°C) lysis time (3, 5, 10, 15 min) (B) the number of magnetic beads for immunomagnetic isolation (IMS). Each bar represents the mean Cq value, and the error bar denotes the standard deviation of four measurements.

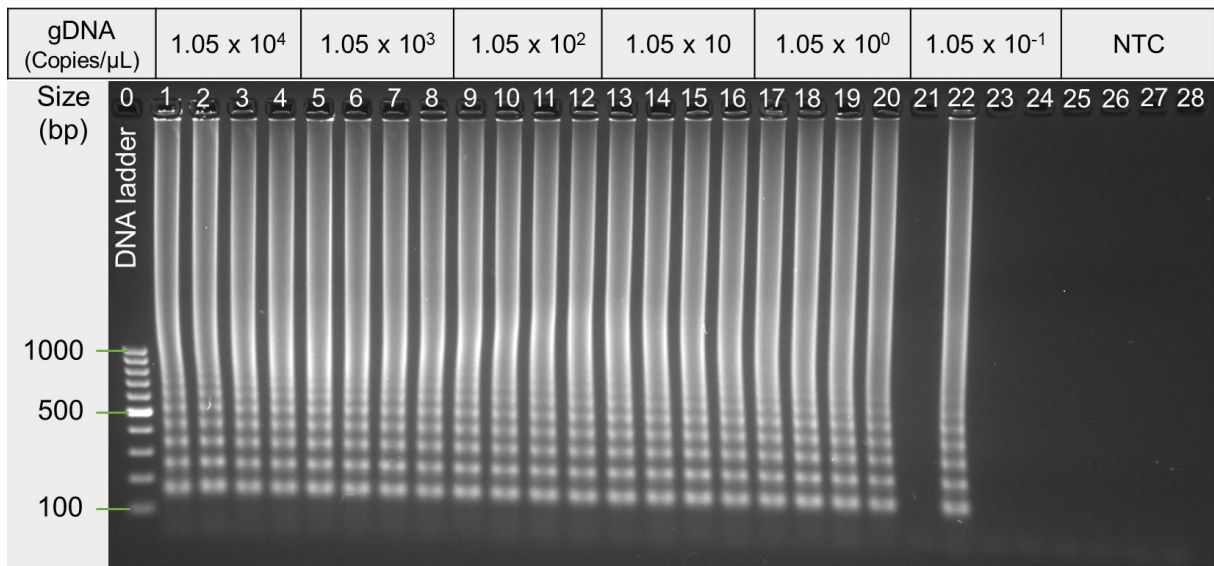

**Figure S3.** Gel electrophoresis of colourimetric LAMP products of different concentrations of *C. parvum* genomic DNA ( $1.05 \times 10^4$ - $1.05 \times 10^{-1}$  Copies/µL).

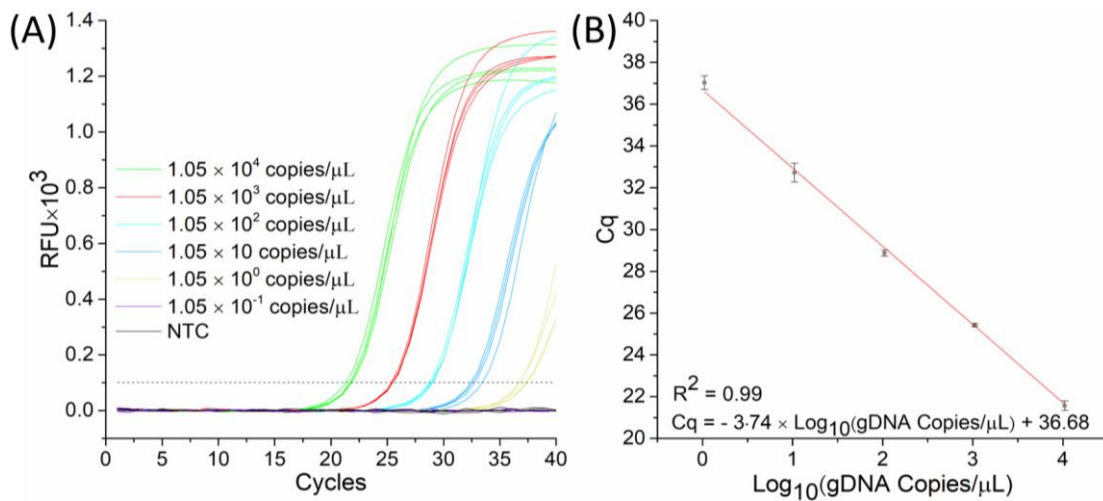

**Figure S4.** (A) qPCR of *Cryptosporidium* genomic DNA with a 10-fold serial dilution from  $1.05 \times 10^4$  copies/ $\mu$ L to  $1.05 \times 10^{-1}$  copies/ $\mu$ L, and (C) the corresponding calibration curve. Each data point in the calibration curve represents the mean value of four measurements. The error bar on each data point represents the standard deviation.

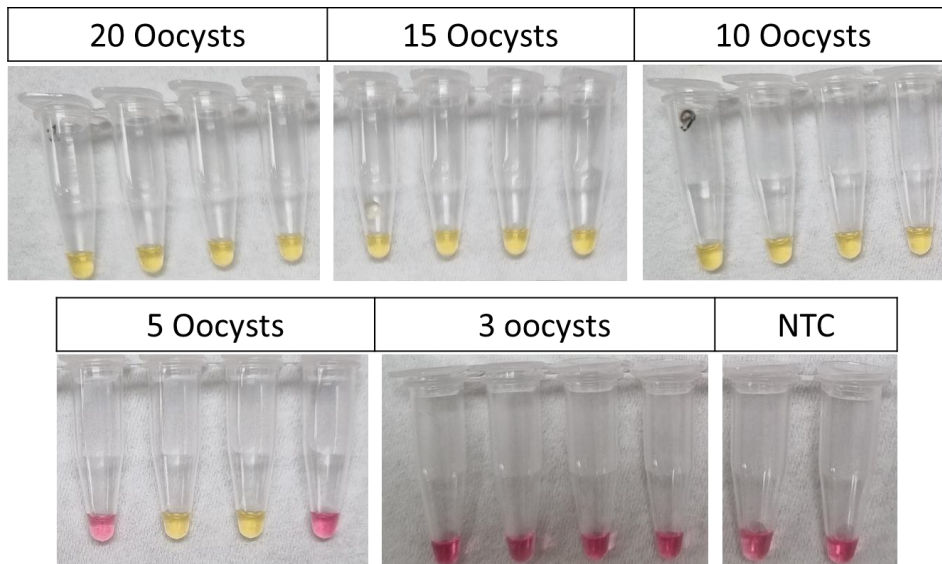

**Figure S5.** cLAMP reactions of different oocysts (3 to 20 oocysts). Oocysts and mud spiked in 10 mL of tap water. Samples were subjected to IMS and heat lysis, followed by cLAMP.

**Table S1:** Primer set for LAMP assay to amplify SAM gene of *Cryptosporidium* species.

| Primer type     | Sequence<br>5'→ 3'                                          | Primer length | Amplicon size (bp) | Target                                                                                                        |
|-----------------|-------------------------------------------------------------|---------------|--------------------|---------------------------------------------------------------------------------------------------------------|
| F3              | ATTTGAT <u>R</u> GACAAAGAACTAG                              | 22            | 216                | S-adenosyl methionine synthetase (SAM) gene of <i>C. parvum</i> , <i>C. hominis</i> and <i>C. meleagridis</i> |
| B3              | CGATTGACTTTGCAACAAG                                         | 19            |                    |                                                                                                               |
| FIP<br>(F1c–F2) | TTGCGCCCTGTTAATCCAGCAT-<br>TAATTAATCCATCTGGCAG <u>R</u> TTT | 45            |                    |                                                                                                               |
| BIP<br>(B1–B2c) | TTGTAGATACATACGGAGGATGGG<br>-TCTACTTTAGTTGCATCTTTCC         | 46            |                    |                                                                                                               |
| LF              | CTGCTGGCCCM <u>C</u> CAATTG                                 | 18            |                    |                                                                                                               |
| LB              | CATGGR <u>G</u> GGTGGTGCATTTAG                              | 20            |                    |                                                                                                               |

\*Degenerate nucleotides for LAMP primers are underlined.

**Table S2:** LAMP primer mix (1.0 mL) preparation and final concentration of each primer.

| Primer type and components     | Volume used to prepare 10X primer mix | Volume of 10X primer mix used per 12.5 µL LAMP reaction | Final concentration for each primer |
|--------------------------------|---------------------------------------|---------------------------------------------------------|-------------------------------------|
| FIP (100µM)                    | 160 µL                                | 1.25 µL                                                 | 1.6 µM                              |
| BIP (100µM)                    | 160 µL                                |                                                         | 1.6 µM                              |
| F3(100µM)                      | 20 µL                                 |                                                         | 0.2 µM                              |
| B3(100µM)                      | 20 µL                                 |                                                         | 0.2 µM                              |
| LF (100µM)                     | 40 µL                                 |                                                         | 0.4 µM                              |
| LB (100µM)                     | 40 µL                                 |                                                         | 0.4 µM                              |
| Nuclease-free H <sub>2</sub> O | 560 µL                                |                                                         |                                     |

**Table S3:** qPCR, RT-qPCR and LAMP reaction calculations

| <b>Components</b>                                          | <b>Volume</b> | <b>Final concentration</b> |
|------------------------------------------------------------|---------------|----------------------------|
| <b>qPCR reaction(10<math>\mu</math>L)</b>                  |               |                            |
| SensiFAST SYBR® No-ROX Mix(2X)                             | 5.0 $\mu$ L   | 1X                         |
| 10 $\mu$ M forward primer (F3)                             | 0.4 $\mu$ L   | 400 nM                     |
| 10 $\mu$ M reverse primer (B3)                             | 0.4 $\mu$ L   | 400 nM                     |
| Target                                                     | 2.5 $\mu$ L   |                            |
| Nuclease-free H <sub>2</sub> O                             | 1.7 $\mu$ L   |                            |
| <b>RT-qPCR reaction (10 <math>\mu</math>L)</b>             |               |                            |
| Luna Universal One-Step Reaction Mix (2X)                  | 5.0 $\mu$ L   | 1X                         |
| Luna WarmStart® RT Enzyme Mix (20X)                        | 0.5 $\mu$ L   | 1X                         |
| 10 $\mu$ M forward primer (F3)                             | 0.4 $\mu$ L   | 400 nM                     |
| 10 $\mu$ M reverse primer (B3)                             | 0.4 $\mu$ L   | 400 nM                     |
| Target                                                     | 2.5 $\mu$ L   |                            |
| Nuclease-free H <sub>2</sub> O                             | 1.2 $\mu$ L   |                            |
| <b>Colorimetric LAMP reaction (12.5 <math>\mu</math>L)</b> |               |                            |
| WarmStart Colorimetric LAMP Master Mix (2X)                | 6.25 $\mu$ L  | 1X                         |
| LAMP Primer Mix (10X)                                      | 1.25 $\mu$ L  | 1X                         |
| Target                                                     | 2.5 $\mu$ L   |                            |
| Nuclease-free H <sub>2</sub> O                             | 2.5 $\mu$ L   |                            |
| <b>Fluorescent LAMP reaction (12.5 <math>\mu</math>L)</b>  |               |                            |
| WarmStart Fluorescent LAMP Master Mix (2X)                 | 6.25 $\mu$ L  | 1X                         |
| Fluorescent dye (50X)                                      | 0.25          | 1X                         |
| LAMP Primer Mix (10X)                                      | 1.25 $\mu$ L  | 1X                         |
| Target                                                     | 2.5 $\mu$ L   |                            |
| Nuclease-free H <sub>2</sub> O                             | 2.5 $\mu$ L   |                            |

**Table S4:** qPCR, RT-qPCR, and LAMP temperature cycling conditions

| Cycle step                                                                                                         | Temperature | Time                  | Cycles |
|--------------------------------------------------------------------------------------------------------------------|-------------|-----------------------|--------|
| <b>qPCR thermal cycling condition</b>                                                                              |             |                       |        |
| Polymerase activation                                                                                              | 95 °C       | 2 min                 | 1      |
| Denaturation                                                                                                       | 95 °C       | 5 sec                 | 40     |
| Annealing                                                                                                          | 56°C        | 10 sec                |        |
| Extension                                                                                                          | 72°C        | 15 sec<br>(+ reading) |        |
| <b>RT-qPCR thermal cycling condition</b>                                                                           |             |                       |        |
| Reverse Transcription                                                                                              | 55°C        | 10 min                | 1      |
| Initial Denaturation                                                                                               | 95°C        | 1 min                 | 1      |
| Denaturation                                                                                                       | 95°C        | 10 sec                | 45     |
| Extension                                                                                                          | 60°C        | 30 sec<br>(+ reading) |        |
| <b>LAMP thermal cycling condition</b>                                                                              |             |                       |        |
| Amplification                                                                                                      | 65°C        | 50 s*                 | 50     |
| Enzyme inactivation                                                                                                | 75°C        | 5 min                 | 1      |
| *Fluorescence reading was taken if it was fLAMP, whereas, for cLAMP, a colour change was observed at the endpoint. |             |                       |        |

**Table S5:** Comparison of commercial kit-based nucleic acid extraction methods with direct lysis for cLAMP assay.

| Nucleic Acid Extraction method | Number of oocysts |      |      |      |      |      |      |      |      |     |     | Matrices                                    |
|--------------------------------|-------------------|------|------|------|------|------|------|------|------|-----|-----|---------------------------------------------|
|                                | 1000              | 500  | 100  | 50   | 30   | 20   | 15   | 10   | 5    | 3   | 2   |                                             |
| DNeasy Blood & Tissue Kits     | 100%              | 100% | 100% | 100% | 100% | 75%  | -    | Neg  | Neg  | -   | -   | NA                                          |
| FastDNA™ SPIN Kit for Soil     | 100%              | 100% | 100% | 100% | 100% | 25%  | -    | Neg  | Neg  | -   | -   | NA                                          |
| This assay                     | 100%              | 100% | 100% | 100% | -    | -    | -    | 100% | 100% | -   | Neg | Tap water                                   |
| This assay                     | -                 | -    | -    | -    | -    | 100% | 100% | 100% | 50%  | Neg | -   | 0.1 mL packed pellet per 10 mL of tap water |



**Table S5:** Comparison of different assays for *Cryptosporidium* oocyst detection

| Assay                                               | Sensor probes/target biomarkers                                                                                                                                                                               | Signal recorded /Detection mode                     | LOD (Normalised LOD)                           | Comments and DNA/RNA extraction procedure                                | Ref |
|-----------------------------------------------------|---------------------------------------------------------------------------------------------------------------------------------------------------------------------------------------------------------------|-----------------------------------------------------|------------------------------------------------|--------------------------------------------------------------------------|-----|
| Electrochemical capacitive biosensor                | Interdigitated gold electrode modified with anti- <i>Cryptosporidium</i> monoclonal antibodies (IgG3)                                                                                                         | Relative capacitance                                | 40 oocysts/5 $\mu$ L (10 oocyst/ $\mu$ L)      | label-free biosensor                                                     | S1  |
| Electrochemical ELISA-type screen-printed electrode | Antibody functionalized screen-printed electrode captures the oocysts. Detection is achieved due to the oxidation of OPD in the presence of H <sub>2</sub> O <sub>2</sub> by HRP-conjugated primary antibody. | Electrode potential                                 | 500 oocysts/mL (0.5 oocysts/ $\mu$ L)          | Potential increases linearly as the number of captured oocysts increases | S2  |
| Electrochemical apta-sensor for oocyst detection    | Aptamer attached to gold nanoparticle-modified carbon electrode captures oocyst to the electrode surface.<br>Aptamer: 5'-/5ThioMC6-D/GGCTTCTGGACTACCTATGC-3'                                                  | Square wave voltammetry (SWV) of ferri/ferrocyanide | 100 oocysts/30 $\mu$ L (3.33 oocysts/ $\mu$ L) | High specificity and selectivity, signal-on sensor                       | S3  |
| Microfluidics with micromesh                        | SUS micromesh having 100(10x10) microcavities (diameter 2.7 $\mu$ m). After capturing the oocysts to                                                                                                          | Fluorescent microscopy                              | 10 oocysts/mL (0.01 oocysts/ $\mu$ L)          | Comparatively rapid (60 minutes)                                         | S4  |

|                                                            |                                                                                                                                                                                                                               |                                                              |                                         |                                                                                                                            |    |
|------------------------------------------------------------|-------------------------------------------------------------------------------------------------------------------------------------------------------------------------------------------------------------------------------|--------------------------------------------------------------|-----------------------------------------|----------------------------------------------------------------------------------------------------------------------------|----|
|                                                            | microcavities, stained with fluorescent antibody.                                                                                                                                                                             |                                                              |                                         |                                                                                                                            |    |
| Optical microfluidic biosensors                            | Immunoagglutinated microbeads with COWP protein                                                                                                                                                                               | Mie scattering intensity                                     | 1–10 oocysts/mL (0.001-0.01/ $\mu$ L)   | Very Rapid (10 minutes analysis time)                                                                                      | S5 |
| CRISPR/Cas12a-powered immunosensor                         | Antibody-DNA conjugates (Texas red labeled) with CRISPR/Cas12a recognition site. The signal amplification happened due to multi-streptavidin sites on antibodies which allow a lot of biotinylated DNA probes to be attached. | 96 well plate fluorescent reading                            | 1 oocyst per reaction                   | Robust and rapid                                                                                                           | S6 |
| CRISPR/Cas12a-powered lateral flow strip (LFS)             | RPA of the gp60 gene followed by CRISPR/Cas12a trans cleavage. Amplification through RPA before CRISPR/Cas12a cleavage activity has made this assay highly sensitive.                                                         | Fluorescence readout, naked eye observation under blue light | 10 oocysts/mL (0.01 oocysts/ $\mu$ L)   | DNA was extracted by boiling the sample with 10% N-lauroylsarcosine sodium salt (LSS) and purified with a homemade column. | S7 |
| GP60 gene LAMP assay for <i>Cryptosporidium</i> detection. | gp60 gene                                                                                                                                                                                                                     | Gel electrophoresis                                          | 1 oocyst per reaction                   | First report on LAMP assay for <i>Cryptosporidium</i> oocyst detection                                                     | S8 |
| Reverse transcription LAMP                                 | 18S rRNA                                                                                                                                                                                                                      | Fluorescent LAMP                                             | $6 \times 10^{-3}$ oocysts per reaction | Highly sensitive due to the plenty of 18S rRNA transcripts                                                                 | S9 |

|                                                                                                                                                                                                                                                            |                                                                                                        |                                   |                                                                 |                                                                                                               |           |
|------------------------------------------------------------------------------------------------------------------------------------------------------------------------------------------------------------------------------------------------------------|--------------------------------------------------------------------------------------------------------|-----------------------------------|-----------------------------------------------------------------|---------------------------------------------------------------------------------------------------------------|-----------|
|                                                                                                                                                                                                                                                            |                                                                                                        |                                   | (calculated from the serial dilution of RNA)                    | Combination of Five freeze (-80°C) and thaw (37°C) cycles, heating, and proteinase K treatment.               |           |
| Uracil DNA glycosylase-supplemented loop-mediated isothermal amplification (UDG-LAMP)                                                                                                                                                                      | SAM gene                                                                                               | Fluorescence                      | 10 oocysts                                                      | More resistant to contaminant<br><br>Stool DNA Isolation Mini-Kit (YT9032, Yekta Tajhiz Co, Iran)             | S10       |
| Detection of <i>Cryptosporidium</i> spp. from environmental samples using LAMP                                                                                                                                                                             | SAM gene                                                                                               | Fluorescence and colorimetric     | 9 Copies per reaction                                           |                                                                                                               | S11       |
| Comparison of three LAMP assays to analyse fecal samples                                                                                                                                                                                                   | SAM gene, <i>hsp 70</i> and <i>gp 60</i> gene<br>SAM LAMP assay was more sensitive than the other two. | Fluorescence                      |                                                                 | 270 fecal samples were analyzed by nested PCR. Nested PCR-negative samples were found to be positive by LAMP. | S12       |
| Accelerated LAMP assay with <i>Cryptosporidium</i> oocyst's lysate                                                                                                                                                                                         | SAM gene and transcript                                                                                | Colorimetric and fluorescent LAMP | 1 copy genomic DNA per reaction<br><br>5-10 oocyst per reaction | Simple heat lysis was used for DNA extraction                                                                 | This work |
| S-adenosyl methionine-L synthetase (SAM), Square wave voltammetry (SWV), glycoprotein 60 (gp60), heat shock protein 70 (hsp70).<br>All the LAMP assays mentioned here targeted the SAM gene used primers published by Bakheit <i>et al.</i> <sup>S12</sup> |                                                                                                        |                                   |                                                                 |                                                                                                               |           |

## REFERENCES

- S1) G. Luka, E. Samiei, S. Dehghani, T. Johnson, H. Najjaran, M. Hoorfar, Label-Free Capacitive Biosensor for Detection of *Cryptosporidium*. *Sensors (Switzerland)*, 2019, **19**, 258.
- S2) O. Laczka, L. Skillman, W. G. Ditcham, B. Hamdorf, D. K. Y. Wong, P. Bergquist, A. Sunna, Application of an ELISA-Type Screen Printed Electrode-Based Potentiometric Assay to the Detection of *Cryptosporidium Parvum* Oocysts. *J. Microbiol. Methods*, 2013, **95**, 182–185.
- S3) A. Iqbal, M. Labib, D. Muharemagic, S. Sattar, B. R. Dixon and M. V. Berezovski, Detection of *Cryptosporidium parvum* oocysts on fresh produce using DNA aptamer, *PLoS One*, 2015, **10**, e0137455.
- S4) T. Taguchi, A. Arakaki, H. Takeyama, S. Haraguchi, M. Yoshino, M. Kaneko, Y. Ishimori, T. Matsunaga, Detection of *Cryptosporidium Parvum* Oocysts Using a Microfluidic Device Equipped with the SUS Micromesh and FITC-Labeled Antibody. *Biotechnol. Bioeng.*, 2007, **96**, 272–280.
- S5) S. V. Angus, H. J. Kwon, J. Y. Yoon, Field-Deployable and near-Real-Time Optical Microfluidic Biosensors for Single-Oocyst-Level Detection of *Cryptosporidium Parvum* from Field Water Samples. *J. Environ. Monit.*, 2012, **14**, 3295–3304.
- S6) Y. Li, F. Deng, T. Hall, G. Vesey and E. M. Goldys, CRISPR/Cas12a-powered immunosensor suitable for ultra-sensitive whole *Cryptosporidium* oocyst detection from water samples using a plate reader, *Water Res.*, 2021, **203**, 117553.
- S7) F. Yu, K. Zhang, Y. Wang, D. Li, Z. Cui, J. Huang, S. Zhang, X. Li and L. Zhang, CRISPR/Cas12a-based on-site diagnostics of *Cryptosporidium parvum* IId-subtype-family from human and cattle fecal samples, *Parasit. Vectors*, 2021, **14**, 1–10.
- S8) P. Karanis, O. Thekisoe, K. Kiouptsi, J. Ongerth, I. Igarashi and N. Inoue, Development and preliminary evaluation of a loop-mediated isothermal amplification procedure for sensitive detection of *Cryptosporidium* oocysts in fecal and water samples, *Appl. Environ. Microbiol.*, 2007, **73**, 5660–5662.
- S9) A. Inomata, N. Kishida, T. Momoda, M. Akiba, S. Izumiyama, K. Yagita and T. Endo, Development and evaluation of a reverse transcription-loop-mediated isothermal amplification assay for rapid and high-sensitive detection of *Cryptosporidium* in water samples, *Water Sci. Technol.*, 2009, **60**, 2167–2172.
- S10) S. Fallahi, S. F. Moosavi, A. Karimi, A. S. Chegeni, M. Saki, P. Namdari, M. M. Rashno, A. M. Varzi, M. J. Tarrahi, M. Almasian, An Advanced Uracil DNA Glycosylase-Supplemented Loop-Mediated Isothermal Amplification (UDG-LAMP) Technique Used in the Sensitive and Specific Detection of *Cryptosporidium Parvum*, *Cryptosporidium Hominis*, and *Cryptosporidium Meleagridis* in AIDS Patients. *Diagn. Microbiol. Infect. Dis.*, 2018, **91**, 6–12.
- S11) N. P. Mthethwa, I. D. Amoah, P. Reddy, F. Bux and S. Kumari, Fluorescence and colorimetric LAMP-based real-time detection of human pathogenic *Cryptosporidium* spp. from environmental samples, *Acta Trop.*, **235**, 106606.

- S12) M. A. Bakheit, D. Torra, L. A. Palomino, O. M. M. Thekiso, P. A. Mbatia, J. Ongerth and P. Karanis, Sensitive and specific detection of *Cryptosporidium* species in PCR-negative samples by loop-mediated isothermal DNA amplification and confirmation of generated LAMP products by sequencing, *Vet. Parasitol.*, 2008, **158**, 11–22.
